# Supplementary material for: KLF5 Inhibition Overcomes Oxaliplatin Resistance In Patient-Derived Colorectal Cancer Organoids by Restoring Apoptotic Response
Source: Research Square preprint supplement (doi:10.21203/rs.3.rs-130881/v1), 2020-12-22
Supplement: Supplementary file 1 [file 331722b9d67105b059057729.docx]

**Table S1 Antibodies for Flow cytometry analysis**

| **Antibody** | **Catalog** | **Manufacturer** |
| --- | --- | --- |
| EpCAM (APC) | 324207 | Biolegend, USA |
| CEA CAM1 (PerCP/Cy5.5) | 342311 | Biolegend, USA |
| CD31 (PE) | 560983 | BD Biosciences, USA |
| CD45 (FITC) | 560976 | BD Biosciences, USA |

**Table S2 Antibodies for IHC analysis**

| **Antibody(Source)** | **Catalog** | **Dilution for IHC** | **Manufacturer** |
| --- | --- | --- | --- |
| Ki-67 (Rabbit) | ab92742 | 1:500 | Abcam, UK |
| EpCAM (Rabbit) | ab223582 | 1:500 | Abcam, UK |
| MUC2 (Rabbit) | ab133555 | 1:200 | Abcam, UK |
| α-SMA (Rabbit) | ab32575 | 1:500 | Abcam, UK |
| CD68 (Mouse) | ab201340 | 1:200 | Abcam, UK |

**Table S3 Antibodies for Immunofluorescence assays**

| **Antibody(Source)** | **Catalog** | **Dilution for IF** | **Manufacturer** |
| --- | --- | --- | --- |
| E-Cadherin (Mouse) | 14472 | 1:100 | CST, USA |
| β-catenin (Rabbit) | A19657 | 1:50 | Abclonal, China |
| Villin (Rabbit) | ab109516 | 1:100 | Abcam, UK |
| Ki-67 (Rabbit) | ab92742 | 1:100 | Abcam, UK |
| EpCAM (Rabbit) | ab223582 | 1:100 | Abcam, UK |

**Table S4 Primer sequences for qPCR**

| **Gene** | **Sequence** |
| --- | --- |
| CASP3 | F: ACACAGTATGGCGGCAGAG  R: AGACAGGCAACAGAGCACAT |
| CASP6 | F: GTTCTGAGCCTCGTGGTTATTC  R: AGCAATTCCTCTCCTCCTGTG |
| CASP7 | F: AAGCATTGTCTGTGGTTGTGTA  R: CAGCCAGGAGCAAGGAGAA |
| CASP9 | F: TTCTCGCTGCTCCGTTCTT  R: ACTGACTGATGGCTCCTTCC |
| BCL2 | F: TGTGAAGTGCTGCTCTATGGT  R: CCGTGGTGAACTGGATGCTA |
| BAX | F: CTTCAGGACACAGGACTCTCAG  R: CGCATCCACCGCACACTAA |
| PARP1 | F: CTTCCTGCCTCCTGTTAGTCA  R: GCTGCTGTCACCTTCATAGTAG |
| BIRC5 | F: GAGTGGATGTGGAGGTGTGA  R: TTCTGGAACTGGATGGTGTCA |
| TNF | F: TCAGCAAGGACAGCAGAGG  R: GCCACGATCAGGAAGGAGAA |
| GAPDH | F: ACCACAGTCCATGCCATCAC  R: TCCACCACCCTGTTGCTGTA |
| BCL2 promoter | F: CACACTCACACGGCCAGAA  R: AAGAAGAAAGAAAGAGCCCTCCTCT |

**Table S5 Antibodies for western blotting**

| **Antibody(Source)** | **Catalog** | **Dilution for wb** | **Manufacturer** |
| --- | --- | --- | --- |
| KLF5 (Rabbit) | 51586 | 1:1000 | CST, USA |
| Cleaved Caspase-3 (Rabbit) | 9661 | 1:1000 | CST, USA |
| Caspase-3 (Rabbit) | 9662 | 1:1000 | CST, USA |
| Bcl-2 (Rabbit) | ab32124 | 1:1000 | Abcam, UK |
| Bax (Rabbit) | ab32503 | 1:1000 | Abcam, UK |
| GAPDH (Mouse) | 60004-1-Ig | 1:1000 | Proteintech, USA |

**Table S6 siRNA Sequences**

| siRNA | **Stem Sequences** |
| --- | --- |
| BCL2-siRNA#1  **BCL2-siRNA#2**  BCL2-siRNA#3 | GTGATGAAGTACATCCATTAT  **TGGATGACTGAGTACCTGAAC**  CCGCATTTAATTCATGGTATT |
| **Bax-siRNA#1**  Bax-siRNA#2  Bax-siRNA#3 | **GACGAACTGGACAGTAACATG**  TTCTACTTTGCCAGCAAACTG  CGAGTGGCAGCTGACATGTTT |

***Bold fonts represent the most effective sequence**
